# Supplementary material for: Synthesis of Os@ZIF-8 nanocomposites with enhanced peroxidase-like activity for detection of Hg2+
Source: Royal Society of Chemistry journal article supplement (doi:10.1039/d3ra08723a), 2024-01-01
Supplement: d3ra08723a1.pdf [file d3ra08723a1.pdf]

Supplementary information for

## Synthesis of Os@ZIF-8 nanocomposites with enhanced peroxidase-like activity for detection of Hg<sup>2+</sup>

Zijie Wei, Cuifeng Jiang\*, Jinshan Wang, Yue Chen

School of Materials Science and Engineering, Yancheng Institute of Technology, Yancheng, 224051, China

Email: cuifengj123@163.com

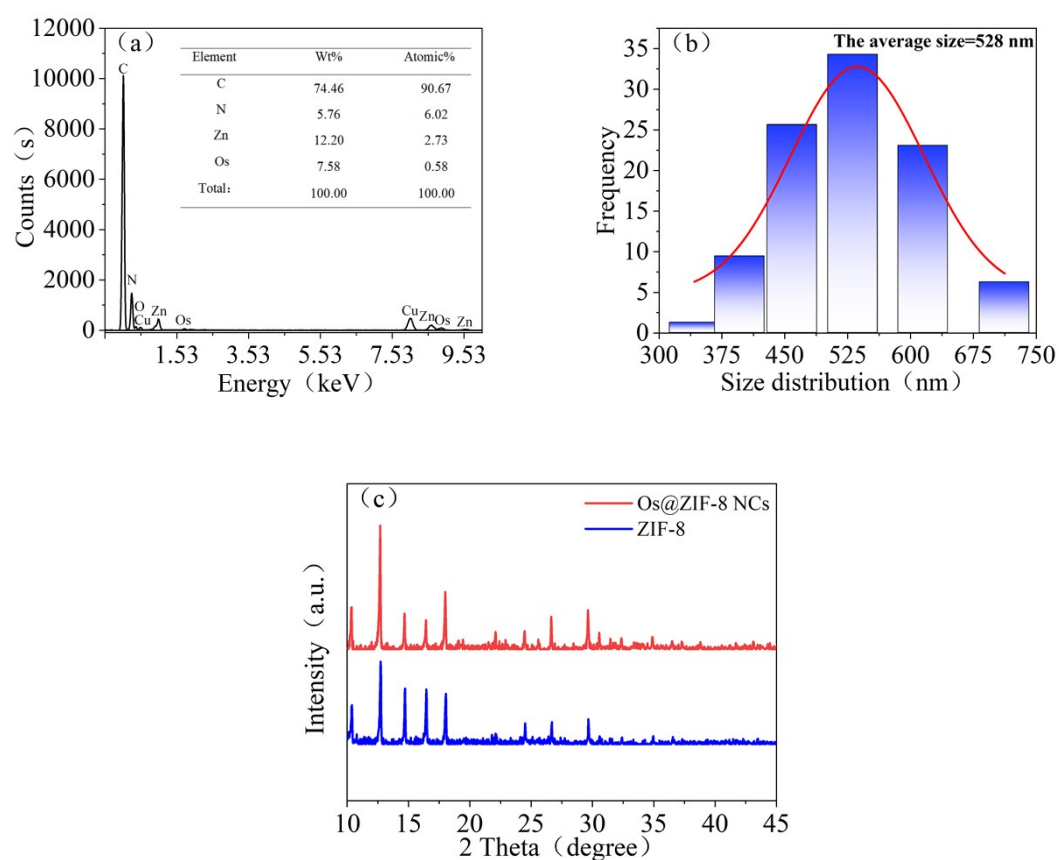

**Fig. S1** (a) EDS spectra of Os@ZIF-8 NCs, (b) size distribution of Os@ZIF-8 NCs, (c) XRD measurement of ZIF-8 and Os@ZIF-8 NCs.

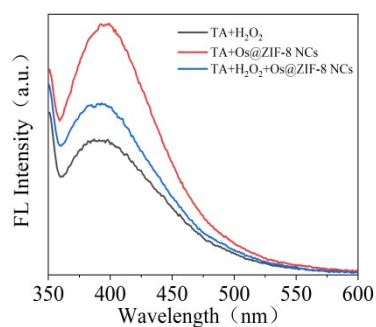

**Fig. S2** Fluorescence spectra of reaction solutions for oxidation of TA excited at 310nm.

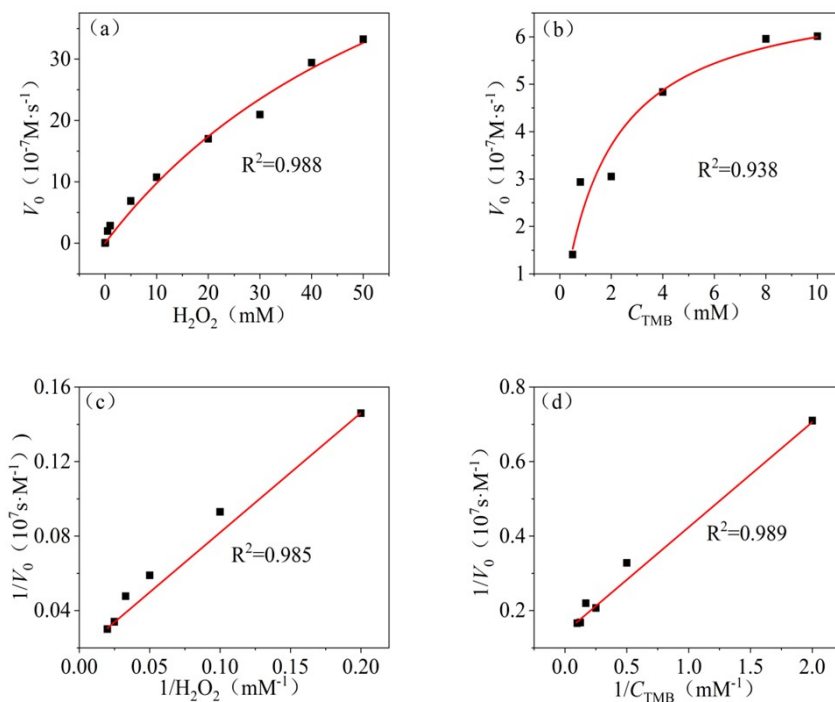

**Fig. S3** Steady-state kinetic analysis with pure Os NPs, Michaelis-Menton trend of (a)  $\text{H}_2\text{O}_2$  and (b) TMB, Lineweaver-Burk double reciprocal of (c)  $\text{H}_2\text{O}_2$  and (d) TMB.

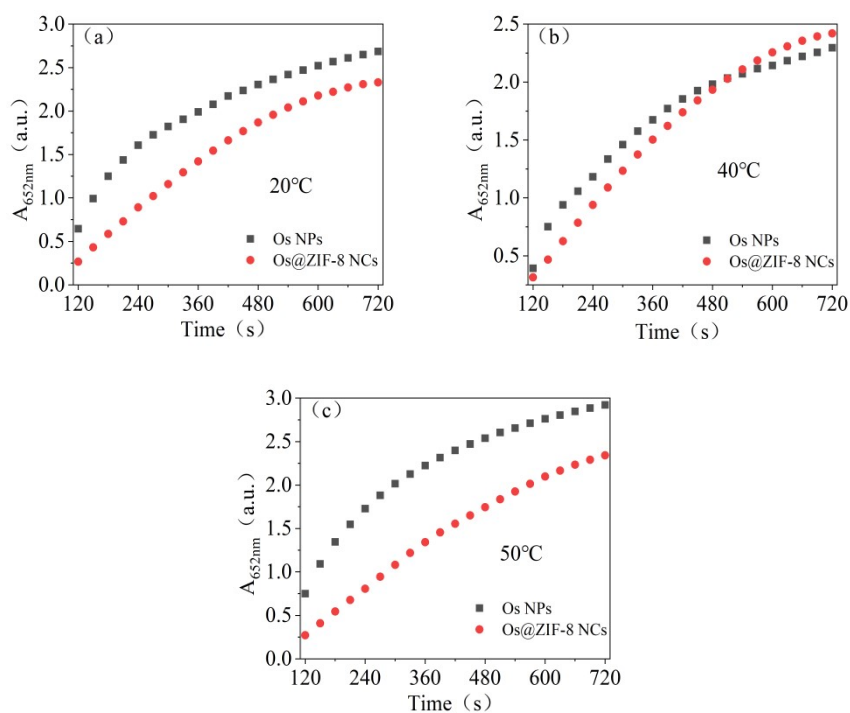

**Fig. S4** Changes in absorption values over time at different temperatures (a) 20°C, (b) 40°C and (c) 50°C.

**Table S1** The average reaction rate constant (k) for both catalyst at three temperature.

| Catalyst     | Temperature(°C) | k(s <sup>-1</sup> ) |
|--------------|-----------------|---------------------|
| Os NPs       | 20              | 0.00439             |
|              | 40              | 0.00431             |
|              | 50              | 0.00492             |
| Os@ZIF-8 NCs | 20              | 0.00517             |
|              | 40              | 0.00494             |
|              | 50              | 0.00507             |

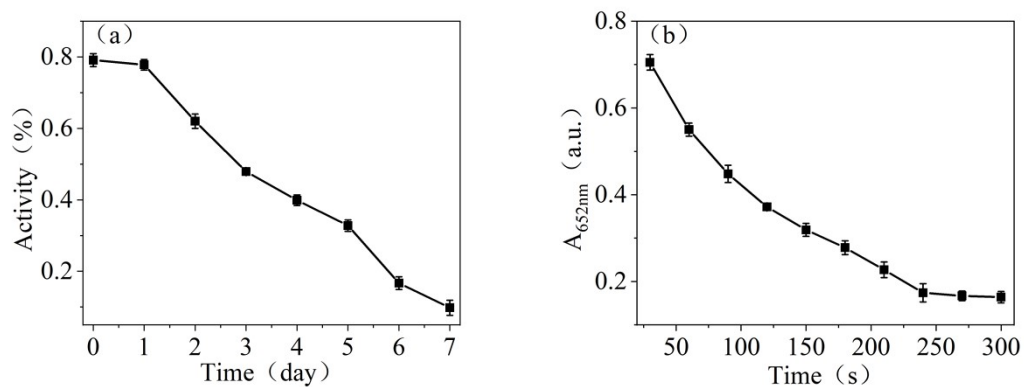

**Fig. S5** (a) Changes in Os@ZIF-8 NCs activity with storage days, (b) the response time of the nanocomposite for Hg<sup>2+</sup> detection.

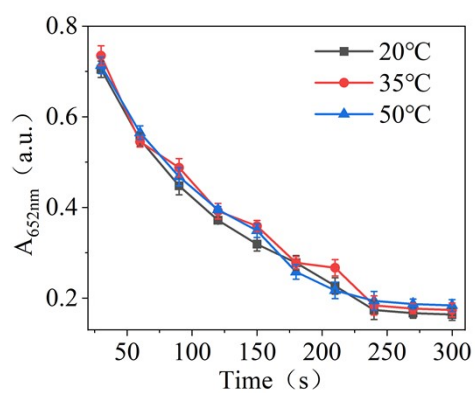

**Fig. S6** The effect of temperature on the Hg<sup>2+</sup> detection.
